# Supplementary material for: Prevalence of exercise-induced bronchoconstriction and exercise-induced laryngeal obstruction in a general adolescent population
Source: HighWire-hosted journal article supplement (doi:10.1136/thoraxjnl-2014-205738), 2014-11-07
Supplement: thoraxjnl-2014-205738supp_table.pdf [file thoraxjnl-2014-205738supp_table.pdf]

|                            | <b>Exercise-induced dyspnoea<br/>n=41</b> | <b>EIB<br/>n=33</b> | <b>EILO<br/>n=9</b> | <b><i>p</i>-value</b> |
|----------------------------|-------------------------------------------|---------------------|---------------------|-----------------------|
| Cough, n (%)               | 21 (51)                                   | 17 (52)             | 3 (33)              | 0.57                  |
| Chest tightness, n (%)     | 18 (44)                                   | 15 (45)             | 4 (44)              | 0.99                  |
| Throat tightness, n (%)    | 20 (49)                                   | 12 (36)             | 5 (56)              | 0.41                  |
| Wheeze, n (%)              | 17 (41)                                   | 13 (39)             | 3 (33)              | 0.87                  |
| Hoarse voice, n (%)        | 14 (34)                                   | 11 (33)             | 1 (11)              | 0.37                  |
| Choking sensation, n (%)   | 14 (34)                                   | 6 (18)              | 3 (33)              | 0.26                  |
| Inspiratory stridor, n (%) | 11 (27)                                   | 9 (27)              | 1 (11)              | 0.57                  |

Self reported exercise induced respiratory symptoms in the group with exercise-induced dyspnoea without EIB or EILO, the group with exercise-induced dyspnoea and positive EIB test (EIB) and the group with exercise-induced dyspnoea and EILO with or without EIB (EILO).
